# Supplementary material for: Trial to Incentivise Adherence for Diabetes (TRIAD): study protocol for a randomised controlled trial
Source: Springer Nature journal article supplement (doi:10.1186/s13063-017-2288-6), 2017-11-17
Supplement: MOESM6 [file 15233838]

## Recommendations to optimally manage your diabetes

- Aim to have blood sugar levels **between 4.0 and 7.0mmol/L** before your meals.
- Measure your blood sugar levels at least on **3 non-consecutive days** in the week.
- The best time to test your blood sugar is before you take your breakfast.
- You are also recommended to test your blood sugar 2 hours after your meals.
  - readings should be below 8.5 mmol/L if you have type 2 diabetes.
- Aim to take **8,000 steps** every day.
- Take your diabetes medication(s) as recommended each day.
- The Site Study Coordinator will note in the table below when you should take your medication:

| Name of diabetes medication | Breakfast | Lunch | Dinner |
|-----------------------------|-----------|-------|--------|
|                             |           |       |        |
|                             |           |       |        |
|                             |           |       |        |

## Goals and financial incentives

### Record healthy blood sugar readings

You will earn incentives for recording glucose readings **between 4 to 7mmols/L before a meal on 3 non-consecutive days** within the week using your glucometer:

- SGD **2 weekly** if one of your glucose readings falls within the normal range,

or:

- SGD **7 weekly** if two of your glucose readings fall within the normal range,

or:

- SGD **14 weekly** if all three of your glucose readings fall within the normal range

**If you meet your goals** you can receive incentives worth up to

SGD **14** per week.

## Calculations and payment of financial incentives

- In case you test more than once during a day, only the first reading will count towards your goal.
- In case you test on a consecutive day, the corresponding reading(s) will not count towards your goal. For instance, if you test on Wednesday, all readings recorded on Thursday will not count towards your goal.
- Only **the first three non-consecutive days of testing** of the week will be counted. For instance, if you test on Monday, Wednesday and Friday, all readings recorded on Saturday and Sunday will not count towards your goal.
- The Site Study Coordinator will calculate the incentives by checking your data on your glucometer.
- All payments will be made in the form of NTUC vouchers at your month 3 and 6 assessments (or at the next visit if the incentive cannot be computed during the visit).
- Payment will only be made if data recorded by your glucometer is provided.

## Additional information

- Your first monitoring assessment period will start the day after your Baseline visit. This monitoring period will be for 84 days. Your incentives will be calculated based on this 84 day period.
- Your second monitoring assessment period will start the day after your month 3 visit. This monitoring period will also last 84 days. Your incentives will be calculated based on this 84 day period.
- You will receive \$15 when you join the study, \$15 for completing the Month 3 Visit, and \$15 for completing the Month 6 Visit.
- Please bring the 3 study devices (Fitbit, eCAP and glucometer) to your Month 3 and Month 6 assessments.
  
- You will be required to return the Fitbit and eCAP at the end of the study.
- Participants who do not have their own glucometer and are given a glucometer at the beginning of the study may keep the glucometer after the study has finished if they wish.
