# Supplementary material for: Trial to Incentivise Adherence for Diabetes (TRIAD): study protocol for a randomised controlled trial
Source: Springer Nature journal article supplement (doi:10.1186/s13063-017-2288-6), 2017-11-17
Supplement: MOESM7 [file 15233838]

## 最适合治疗您的糖尿病的建议

- 目标是在吃饭前，血糖值应该要在4.0 至 7.0 mmol/L之间。
- 一个星期里在三个非连续天测量您的血糖值。
- 最好测量血糖值的时间是在吃早餐前。
- 我们也建议您吃饭后两个小时，测量您的血糖值。

◇您的血糖应该在8.5mmol/L 以下要是您有2型糖尿病

- 目标是每天走8,000步。
- 服用每天所推荐的糖尿病药物。
- 研究分支联络人会在研究以下的表写您应该几时吃您的药物:

| 糖尿病药物的名称 | 早餐 | 午餐 | 晚餐 |
|----------|----|----|----|
|          |    |    |    |
|          |    |    |    |
|          |    |    |    |

## 目标和金钱奖励

### 记录健康的血糖读数

您将获得奖励要是您使用您的血糖仪在一周之内3个非连续天用餐前的血糖读数是4至7mmols/ L之间：

- 每周2新元，如果您有一个血糖读数是在正常范围之内，

或：

- 每周7新元，如果您的两个血糖读数是在正常范围之内，

或：

- 每周14新元，如果您所有三个血糖读数是在正常范围内。

- 如果您达到您的目标，您可以收到价值高达每周14新元的奖励。

## 请注意下列条件：

- 如果您在一天测试多次，只有第一个读数将计入您的目标。
- 如果您连续两天测试，相应的读数将不计入您的目标。例如，如果您在周三测试，周四所有读数将不计入您的目标。
- 一周的测试中，只有前三个不连续的日子将被计算在内。例如，如果您在周一，周三和周五测试，周六和周日所有读数将不计入您的目标。
- 研究分支联络人将通过检查您的血糖仪的数据计算奖励。
- 所有款项将在您的第3个月和6个月评估以**NTUC礼券**付给您（或者在下一次访问如果数据不能在访问期间计算完成）。
- 付款只会在您提供研究设备的数据后进行。

## 附加信息

- 您的第一次监测评估期将从您的基线访问后的一天开始。这一监测期将是**84天**。您的奖励将以这**84天**的时间计算。
- 您的第二次监测评估期将从您第**3个月**访问后的一天开始。该监控期也将持续**84天**。您的奖励将以这**84天**的时间计算。
- 您会因参加这项研究，完成第三个月和第六个月的评估而各获得**\$15**的礼券。
- 在您的**第 3 和 6 个月评估时**，请携带全三样研究器材（Fitbit计步器、电子容器eCAP、和血糖仪）。
- 研究完成过后，您必须退还您拿到的Fitbit和eCAP。
- 如果参加者没有自己的血糖测计仪，那他在研究开始时收到的血糖测计仪将能在研究过后留着继续使用。
